# Supplementary material for: Is Piperacillin-Tazobactam an Appropriate Empirical Agent for Hospital-Acquired Sepsis and Community-Acquired Septic Shock of Unknown Origin in Australia?
Source: MDPI journal article supplement (doi:10.3390/healthcare10050851), 2022-05-05
Supplement: s1 [file s1]

**Table S1.** Additional case reports addressing the clinical efficacy of TZP as monotherapy in sepsis

| Reference                    | Time period | Setting | Study design | Sample size | Causative pathogen             | Key findings                                                                                                           | Limitations                                                                         |
|------------------------------|-------------|---------|--------------|-------------|--------------------------------|------------------------------------------------------------------------------------------------------------------------|-------------------------------------------------------------------------------------|
| <b>Gram-negative aerobes</b> |             |         |              |             |                                |                                                                                                                        |                                                                                     |
| Yokota 2012[1]               | 2012        | Japan   | Case report  | 1           | <i>Raoultella planticola</i>   | A patient with acute cholangitis achieved clinical improvement with high dose definitive TZP therapy.                  | Case report;<br>No data on mortality, as patient subsequently transferred hospitals |
| Ahsan 2019[2]                | 2019        | USA     | Case report  | 1           | <i>Chryseobacterium</i> spp.   | A septic haemodialysis patient relapsed on ampicillin-sulbactam and responded well to TZP.                             | Case report                                                                         |
| Yaita 2013[3]                | 2011        | Japan   | Case report  | 1           | <i>P. aeruginosa</i>           | Patient with liver abscesses developed a new liver abscess from which TZP-resistant <i>P. aeruginosa</i> was isolated. | Case report                                                                         |
| Sohn 2015[4]                 | 2015        | Korea   | Case report  | 1           | <i>Delftia lacustris</i>       | Septic patient with phaeochromocytoma. Clinical and microbiological resolution with two weeks of TZP.                  | Case report                                                                         |
| <b>Anaerobes</b>             |             |         |              |             |                                |                                                                                                                        |                                                                                     |
| Hung 2014[5]                 | 2014        | Taiwan  | Case report  | 1           | <i>Clostridium innocuum</i>    | An immunocompromised patient recovered with two weeks of TZP.                                                          | Case report                                                                         |
| Hans 2016[6]                 | 2016        | USA     | Case report  | 1           | <i>Pediococcus pentosaceus</i> | Sepsis secondary to complicated urinary tract infection resolved with ten days of TZP.                                 | Case report                                                                         |

**Table S2.** Additional case report relating to clinical outcomes related to TZP pharmacokinetic and dosing considerations in sepsis

| Reference          | Time period | Setting | Study design | Sample size | Key findings                                                                                                                                                                                                                           | Limitations |
|--------------------|-------------|---------|--------------|-------------|----------------------------------------------------------------------------------------------------------------------------------------------------------------------------------------------------------------------------------------|-------------|
| D'Agostino 2015[7] | 2015        | USA     | Case report  | 1           | In a patient with <i>Elizabethkingia meningosepticum</i> bacteraemia, switch from standard to high dose extended infusion resulted in microbiological clearance. No clinical improvement, however, and patient transferred to hospice. | Case report |

## References

1. Yokota K, Gomi H, Miura Y, Sugano K, Morisawa Y. Cholangitis with septic shock caused by *Raoultella planticola*. *Journal of medical microbiology*. 2012;61(Pt 3):446-9.
2. Ahsan MJ, Ahmad S, Latif A, Reddy JT. *Chryseobacterium* spp-associated bacteraemia in a haemodialysis patient: a diagnostic challenge. *BMJ case reports*. 2019;12(11).
3. Yaita K, Sameshima I, Takeyama H, Matsuyama S, Nagahara C, Hashiguchi R, et al. Liver abscess caused by multidrug-resistant *Pseudomonas aeruginosa* treated with colistin; a case report and review of the literature. *Internal medicine (Tokyo, Japan)*. 2013;52(12):1407-12.
4. Sohn KM, Baek J-Y. *Delftia lacustris* septicemia in a pheochromocytoma patient: case report and literature review. *Infectious diseases (London, England)*. 2015;47(5):349-53.
5. Hung Y-P, Lin H-J, Wu C-J, Chen P-L, Lee J-C, Liu H-C, et al. Vancomycin-resistant *Clostridium innocuum* bacteremia following oral vancomycin for *Clostridium difficile* infection. *Anaerobe*. 2014;30(9505216):24-6.
6. Han A, Mehta J, Pauly RR. Septic Shock Secondary to a Urinary Tract Infection with *Pediococcus Pentosaceus*. *Missouri medicine*. 2016;113(3):179-81.
7. D'Agostino C, Rhodes NJ, Skoglund E, Roberts JA, Scheetz MH. Microbiologic clearance following transition from standard infusion piperacillin-tazobactam to extended-infusion for persistent Gram-negative bacteremia and possible endocarditis: A case report and review of the literature. *Journal of infection and chemotherapy : official journal of the Japan Society of Chemotherapy*. 2015;21(10):742-6.
